# Supplementary material for: Contacts-based prediction of binding affinity in protein–protein complexes
Source: eLife journal article supplement (doi:10.7554/elife.07454), 2015-07-20

**Figure 5 – Figure Supplement 1**

**(A)** Relative contribution (percentage) of each Fab D3H44 interfacial residues to the total BSA (in hot pink) and ICs (in green). **(B)** Corresponding solvent accessible surface area in Å2 of the Fab D3H44 residues in the free form (separated proteins taken from the complex).


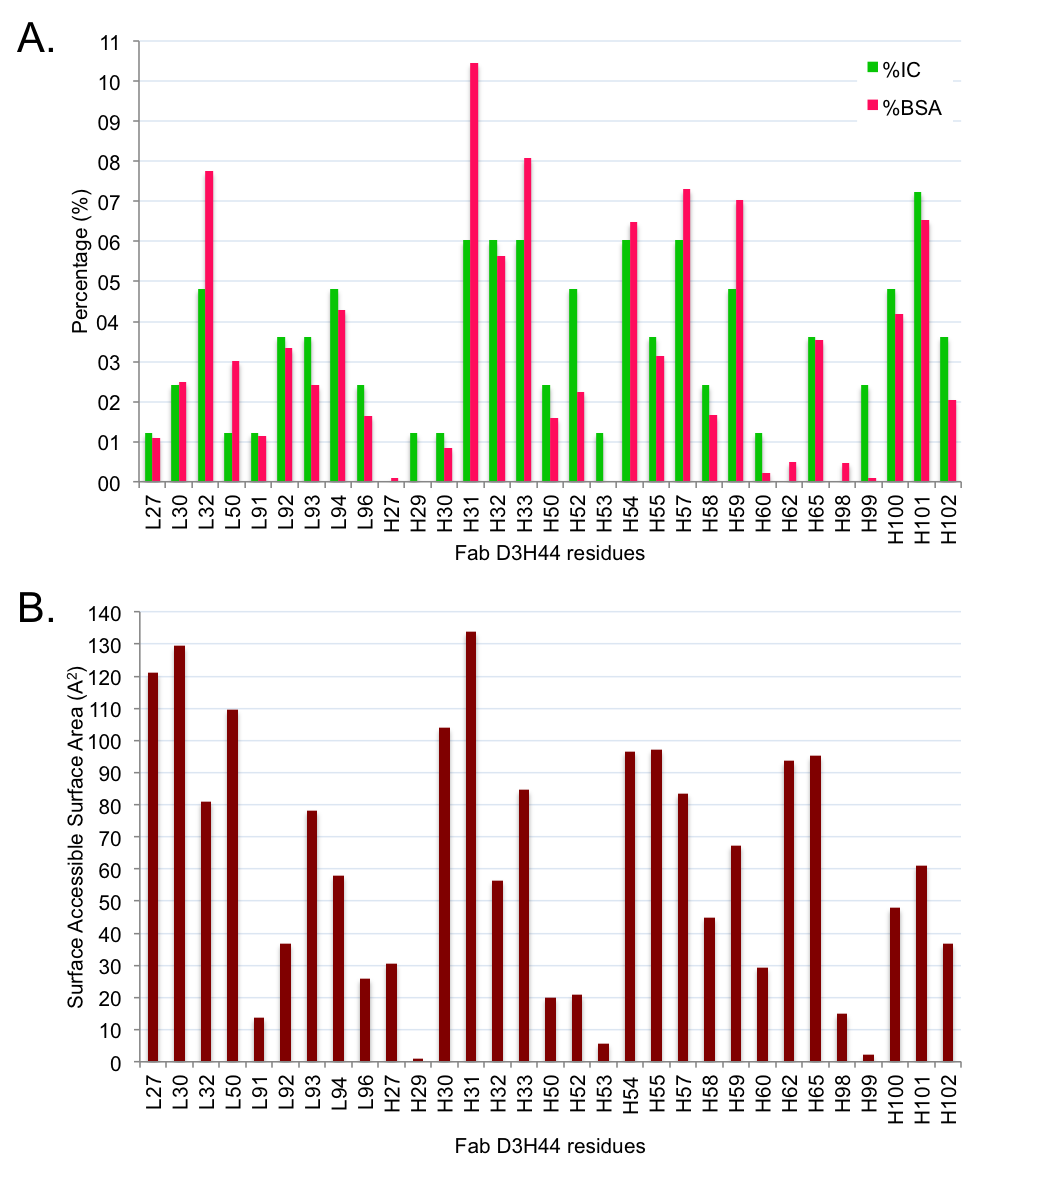

Supplement: supp [file elife_poa_e07454_Figure_5_figure_supplement_1.docx]
